# Supplementary figures and images for: Diphtheria toxin activates ribotoxic stress and NLRP1 inflammasome-driven pyroptosis
Source: PubMed Central journal article supplement — J Exp Med. 2023 Aug 29;220(10):e20230105. doi: 10.1084/jem.20230105 (PMC10465786; doi:10.1084/jem.20230105), 2023-08-29

# SourceDataF1D

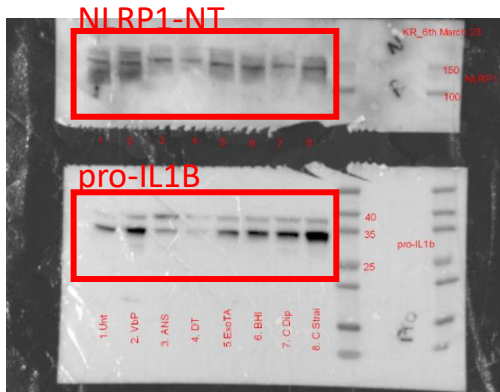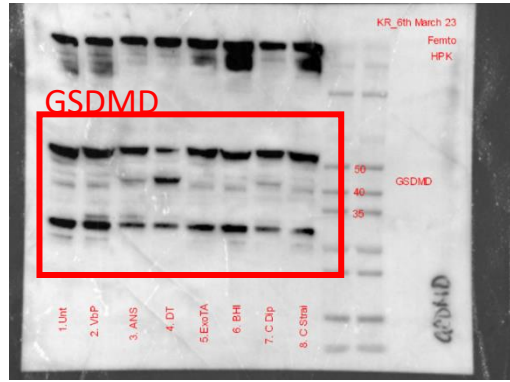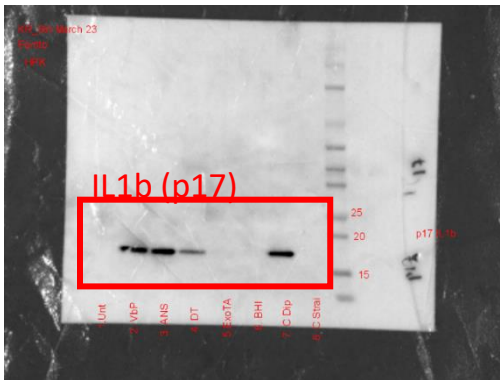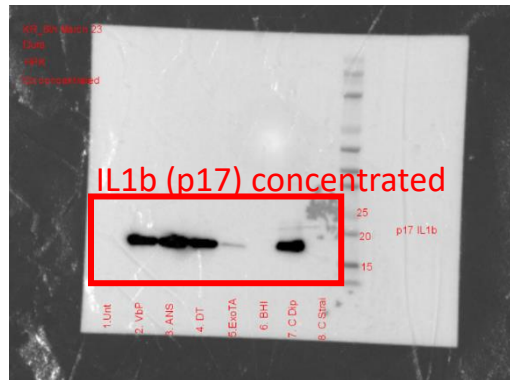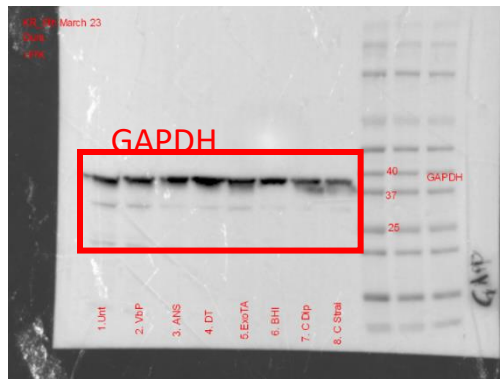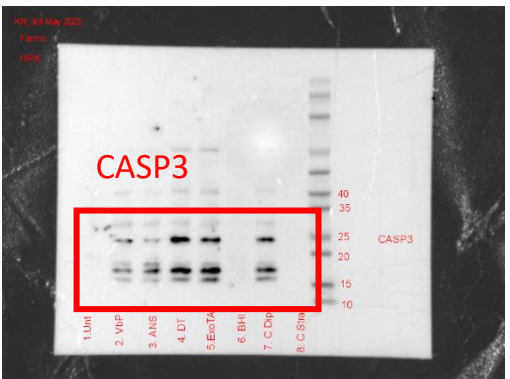

Supplement: JEM_20230105_SourceDataF1.pdf [file JEM_20230105_SourceDataF1.pdf]

# SourceDataF3B

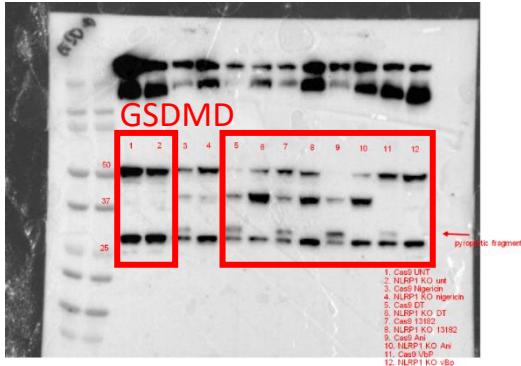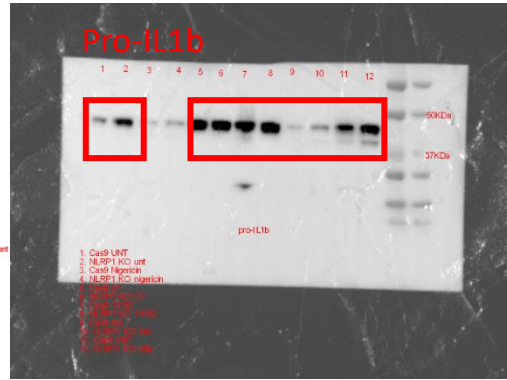

KR\_27 Apr 2023

Femto after washing

HPK

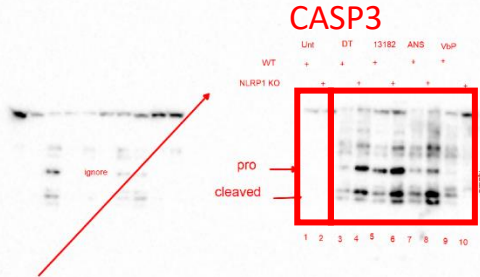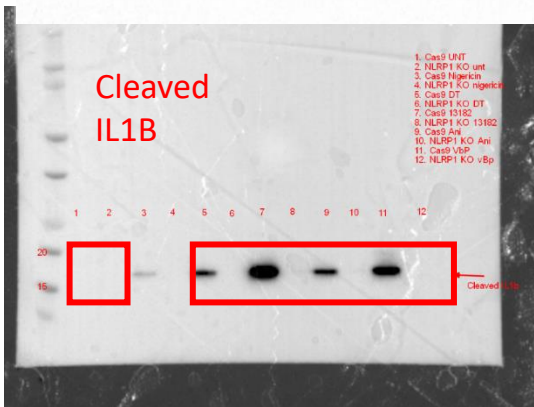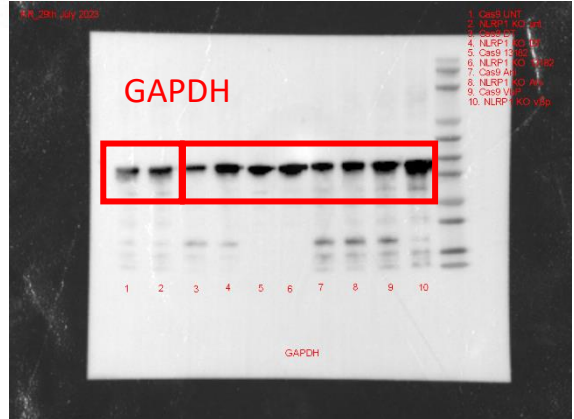

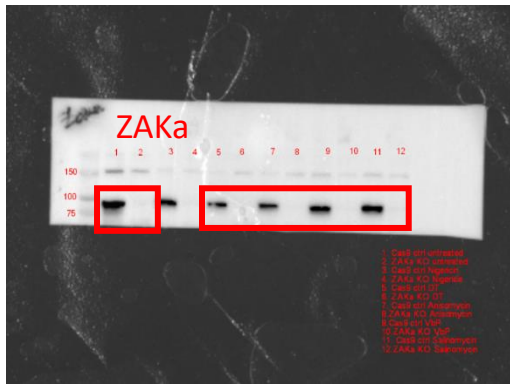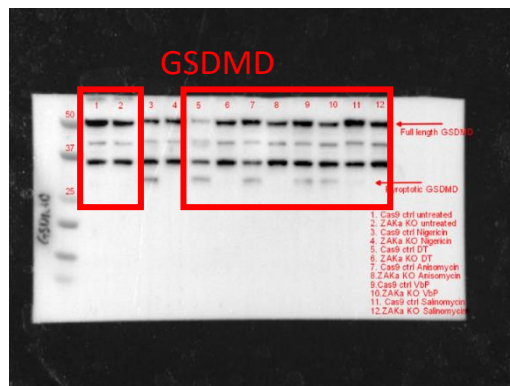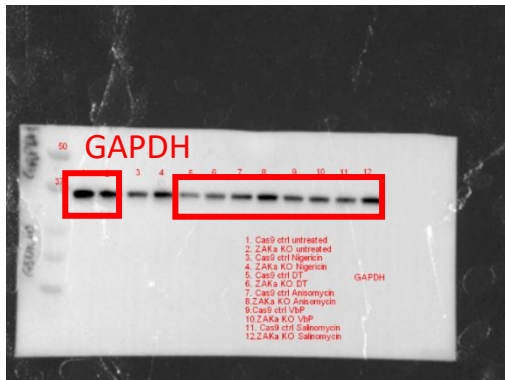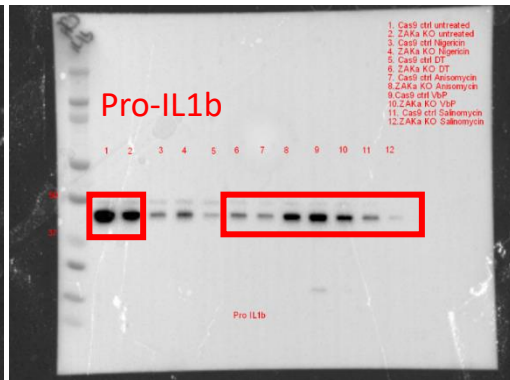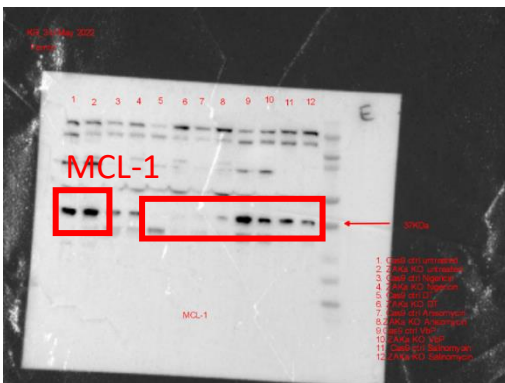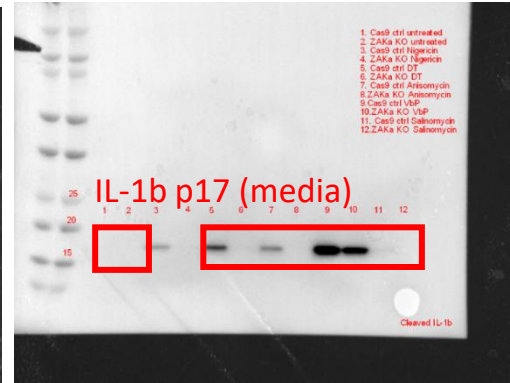

Supplement: JEM_20230105_SourceDataF3.pdf [file JEM_20230105_SourceDataF3.pdf]

# SourceDataF5G

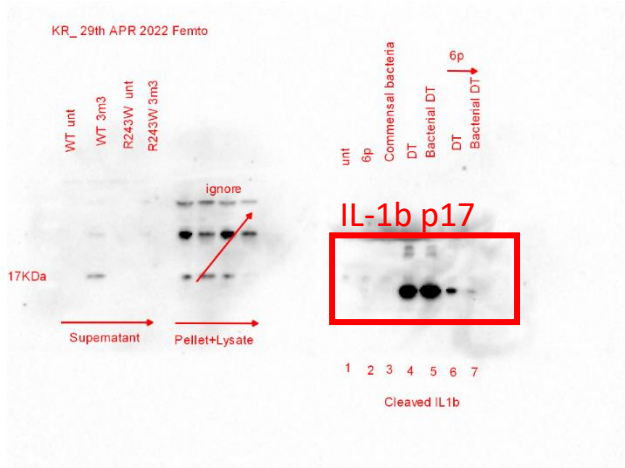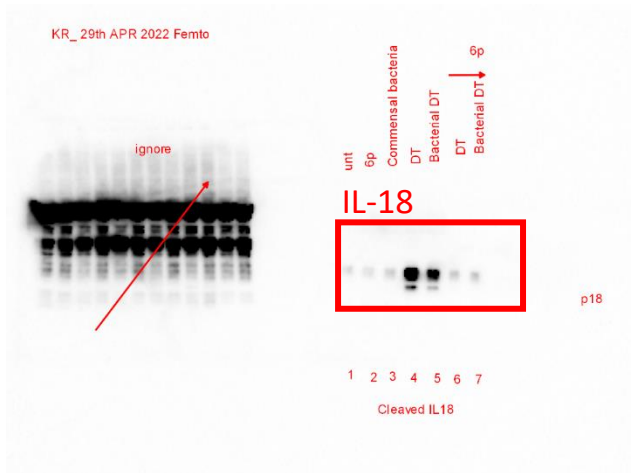

Supplement: JEM_20230105_SourceDataF5.pdf [file JEM_20230105_SourceDataF5.pdf]

# SourceDataFS2D

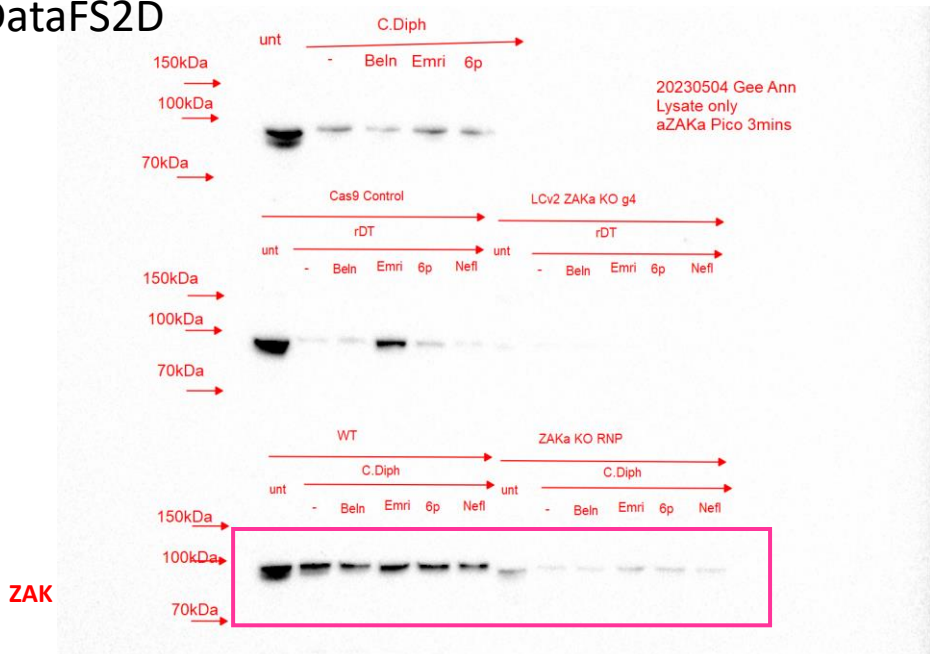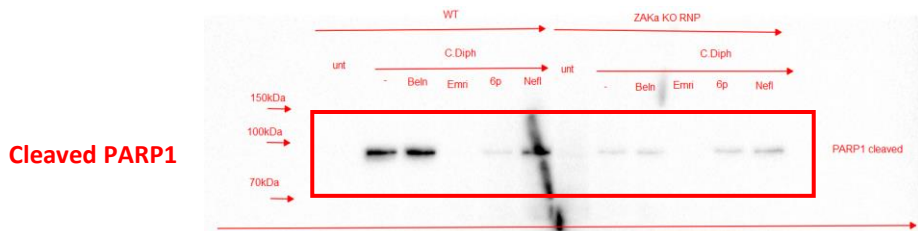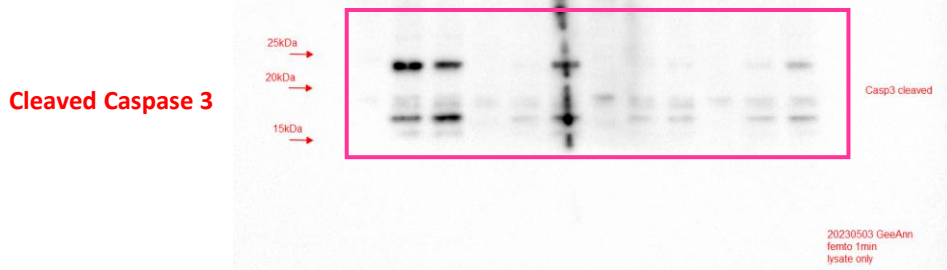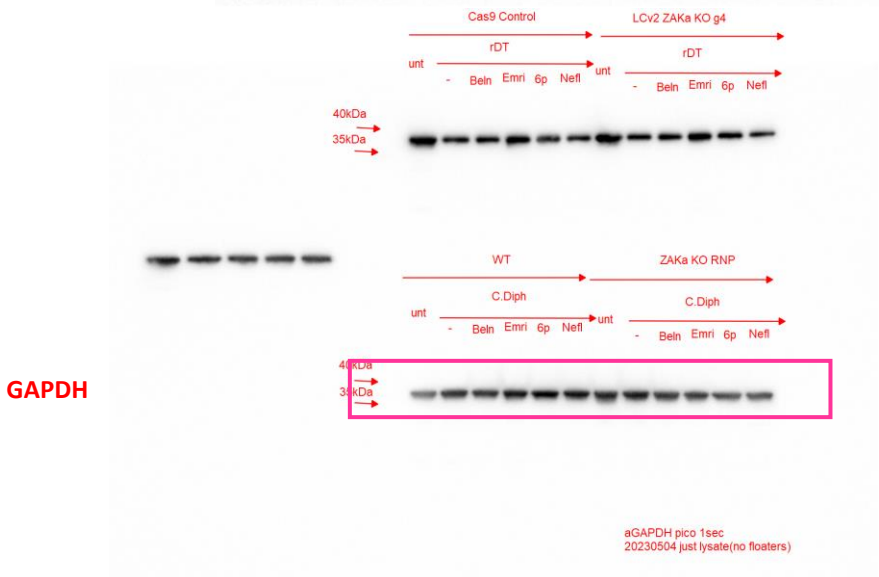

# SourceDataFS2E

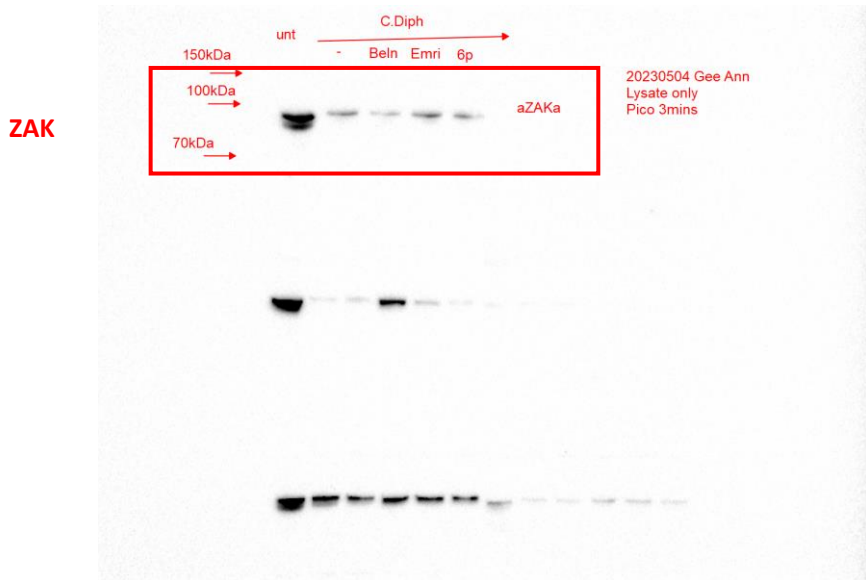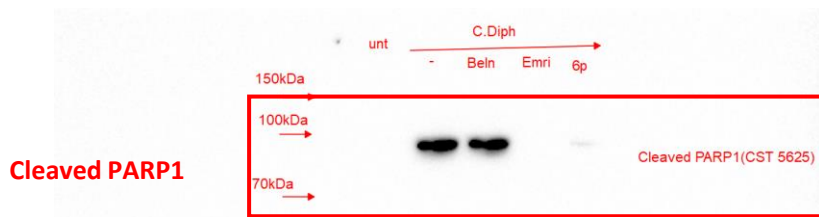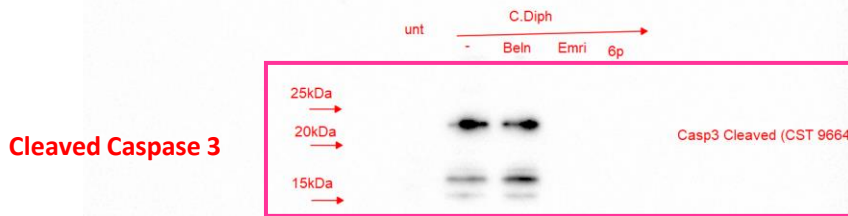

20230503 Gee Ann  
Lysate only  
Femto 1min

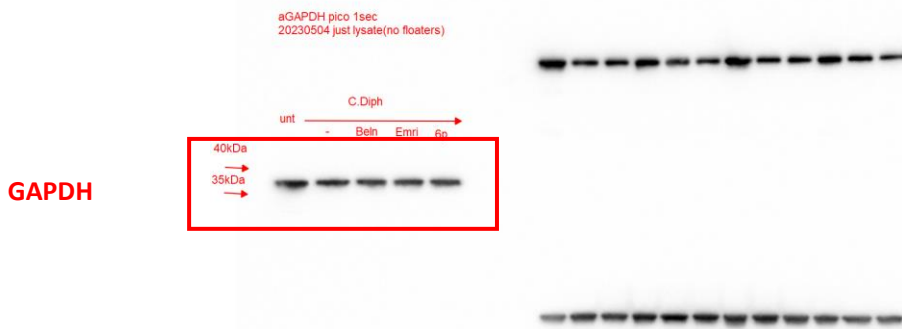

# SourceDataFS2F

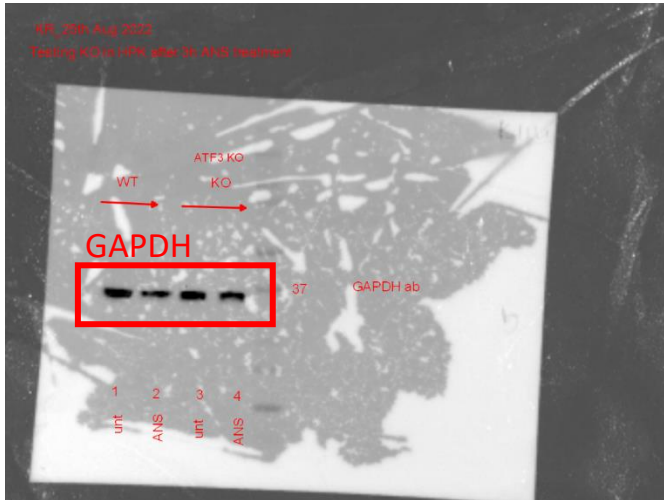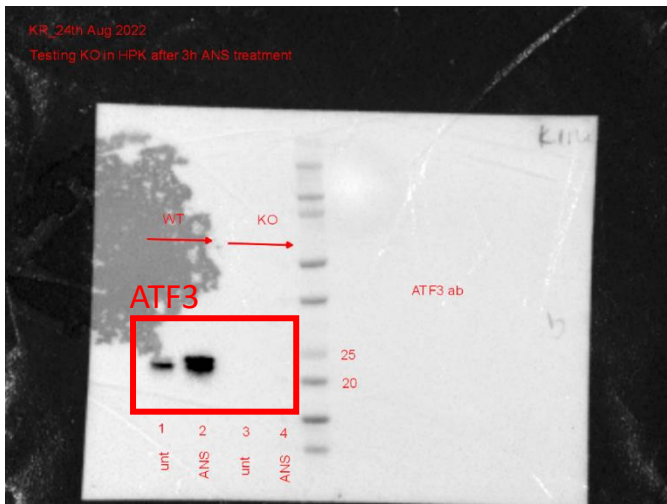

# SourceDataFS2G

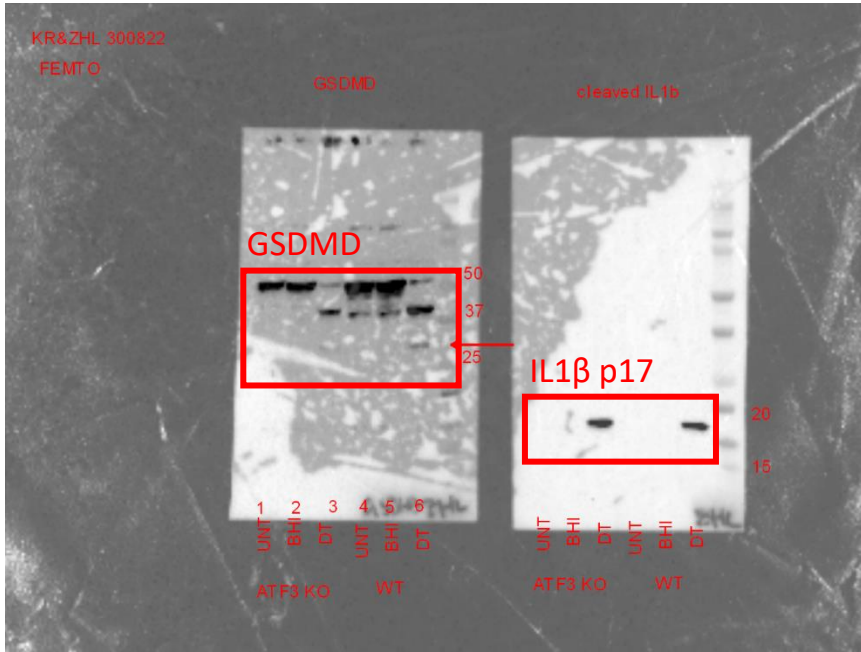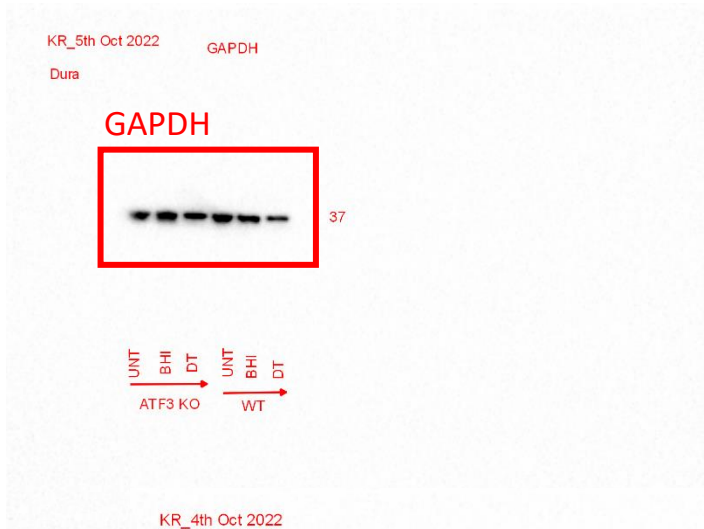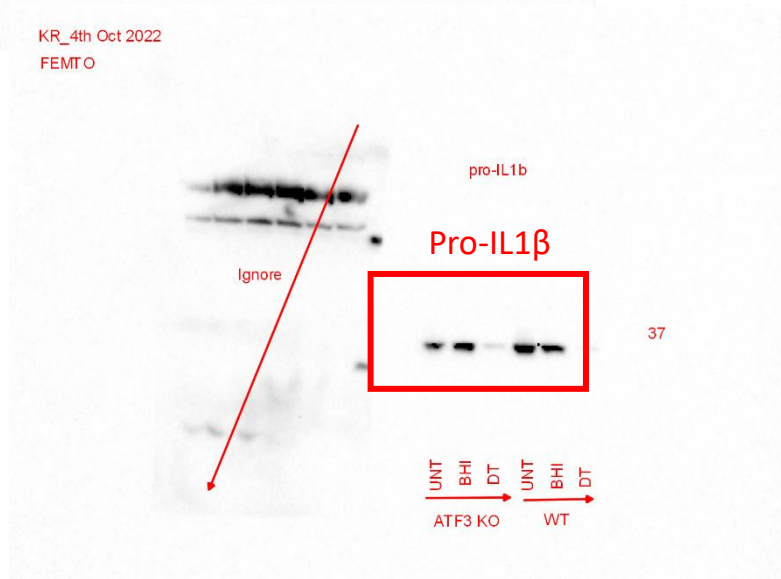

Supplement: JEM_20230105_SourceDataFS2.pdf [file JEM_20230105_SourceDataFS2.pdf]
